# Supplementary material for: Prediction of the differences in tumor mutation burden between primary and metastatic lesions by radiogenomics
Source: PubMed Central journal article supplement — Cancer Sci. 2021 Nov 11;113(1):229–39. doi: 10.1111/cas.15173 (PMC8748253; doi:10.1111/cas.15173), 2021-11-11
Supplement: CAS-113-229-s002.pdf [file CAS-113-229-s002.pdf]

Supplementary Figure 1

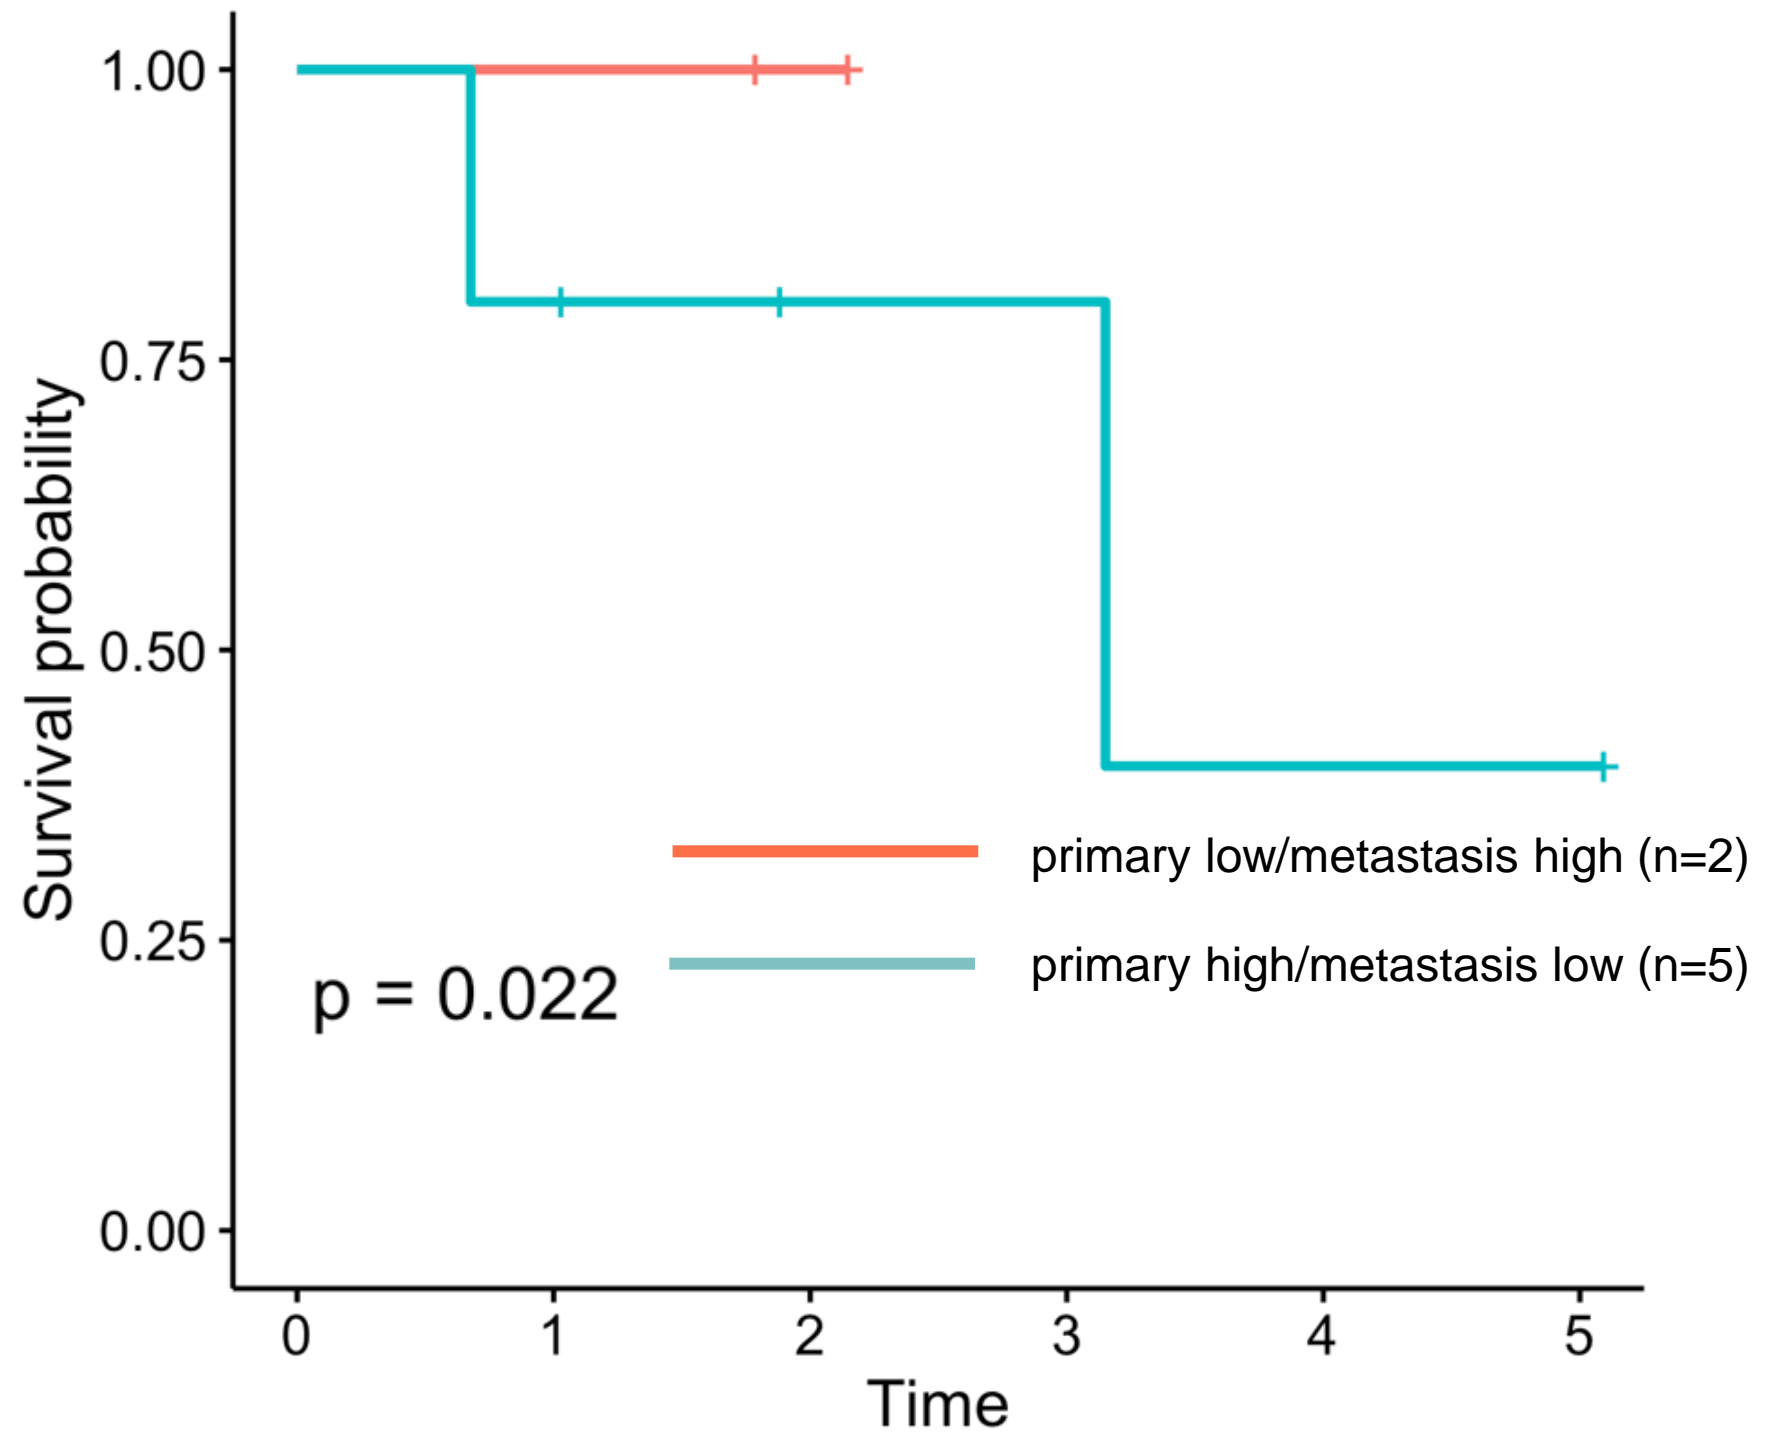

Prognostic curve with TMB status divided into cases of primary high / metastasis low and primary low / metastasis high. As a result, the prognosis of the primary high / metastasis low group was poor.
